# Supplementary material
Source: PubMed Central journal article supplement (PMC6053656)
Supplement: develop-145-164855-s1.pdf [file develop-145-164855-s1.pdf]

## Supplementary materials

**Fig. S1**

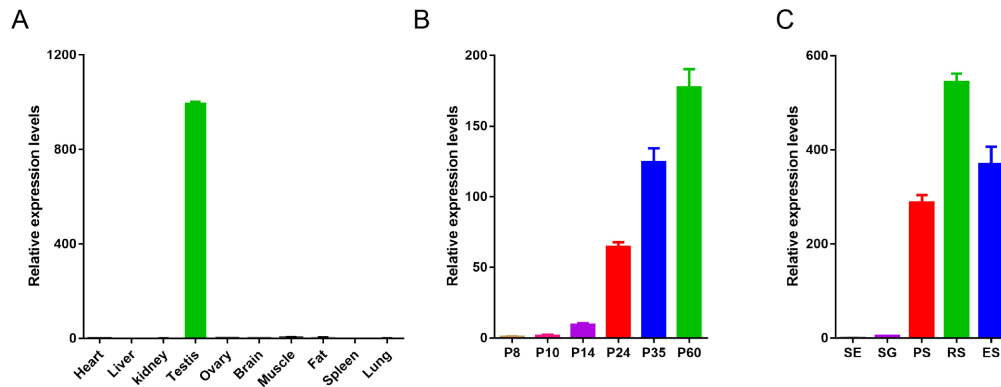

**Fig. S1.** (A) Quantitative RT-PCR analysis of *Sox30* mRNA transcripts in multiple tissues from adult mice. Gene expression was normalized to *Rplp0* (*36b4*). (B) Levels of *Sox30* mRNA in testis tissue collected postnatal day 8 (P8), P10, P24, P35 and P60. The expression level of *Sox30* mRNA at P7 was arbitrarily set as 1. Data presented are mean  $\pm$  s.d. from three independent experiments.

Fig. S2

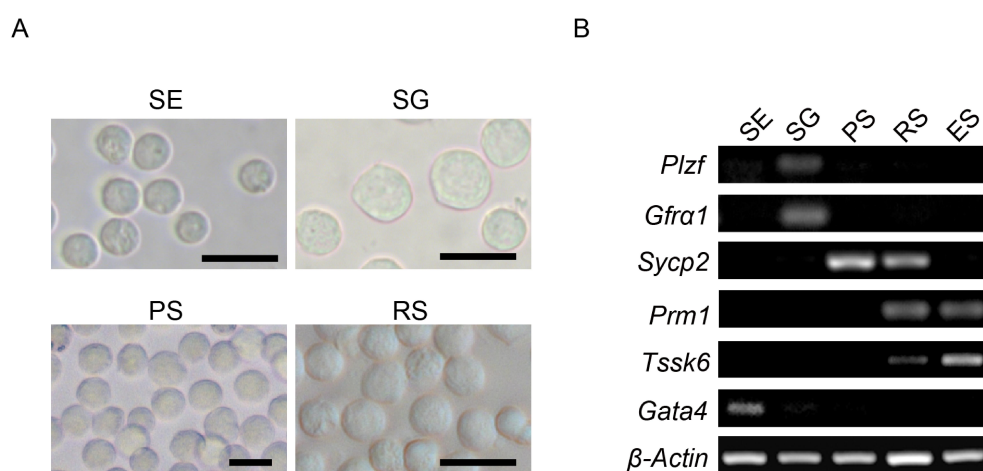

**Fig. S2.** (A) The purity of mouse testis cell populations collected using the STA-PUT method was confirmed by morphological appearance of spermatogonia (SG), pachytene spermatocytes (PS), round spermatids (RS), and elongating spermatids (ES). SE and SG were isolated from P6-8 mice, and PS and RS as well as elongating spermatids (ES) from 8-week-old mice. Scale bars, 25  $\mu$ m. (B) To further validate the identity of cell populations collected via STA-PUT, expression of key marker genes was assessed by RT-PCR, including *Plzf*, *Gfra1* (spermatogonia), *Sycp2* (meiotic spermatocytes), *Prm1* and *Tssk6* (postmeiotic cells) and *Gata4* (Sertoli cells). *Actin* served as a control.

Fig. S3

A

| Sox30 founders by CRISPR/Cas9 |        |                                                                                                                                                                                                                                                                                  |                                                                                                                     |           |
|-------------------------------|--------|----------------------------------------------------------------------------------------------------------------------------------------------------------------------------------------------------------------------------------------------------------------------------------|---------------------------------------------------------------------------------------------------------------------|-----------|
| ID                            | Gender | Nucleotide Sequence                                                                                                                                                                                                                                                              | Amino acid sequences                                                                                                | Fertility |
|                               |        | ...CACCGG <b>CCAGCACTAGCCAAAGCTAACCCAGCCGCCAACCAATGCAGAAATC</b><br>AGTGTCCAGCTCGGGTTA...                                                                                                                                                                                         | ...HRPALAKANPAANNAEISVQLGL                                                                                          |           |
| #1                            | ♂      | ...CACCGG <b>CCAGCACTAGCCAAAGCTAACCCAGCCGCCAACCAATGCAGAAATC</b><br>AGTGTCCAGCTCGGGTTA...<br>...CACCGG <b>CCAGCACTAGCCAAAGCTAACCCAGCCGCCAACCAATGCAGAAATC</b><br>AGTGTCCAGCTCGGGTTA...<br>...CACCGG <b>CCAGCACTAGCCAAAGCTAACCCAGCCGCCAACCAATGCAGAAATC</b><br>AGTGTCCAGCTCGGGTTA... | ...HRPA--KANPAANNAEIS <b>SG</b> STOP<br>...HRPA--<br>...H-- <b>H</b> STOP<br>...HRPAL <b>S</b> STOP                 | Infertile |
| #2                            | ♂      | ...CACCGG <b>CCAGCACTAGCCAAAGCTAACCCAGCCGCCAACCAATGCAGAAATC</b><br>AGTGTCCAGCTCGGGTTA...<br>...CACCGG <b>CCAGCACTAGCCAAAGCTAACCCAGCCGCCAACCAATGCAGAAATC</b><br>AGTGTCCAGCTCGGGTTA...                                                                                             | ...HRPA <b>PKLTPPTMOKSARV</b> VE<br><b>QT</b> STOP                                                                  | Infertile |
| #3                            | ♂      | ...CACCGG <b>CCAGCACTAGCCAAAGCTAACCCAGCCGCCAACCAATGCAGAAATC</b><br>AGTGTCCAGCTCGGGTTA...<br>...CACCGG <b>CCAGCACTAGCCAAAGCTAACCCAGCCGCCAACCAATGCAGAAATC</b><br>AGTGTCCAGCTCGGGTTA...                                                                                             | ...HRPA <b>ARVRVEQT</b> STOP                                                                                        | Fertile   |
| #4                            | ♂      | Wild type<br>...CACCGG <b>CCAGCACTAGCCAAAGCTAACCCAGCCGCCAACCAATGCAGAAATC</b><br>AGTGTCCAGCTCGGGTTA...                                                                                                                                                                            | Wild type<br>...QLTQPPTMOKSVSS <b>SG</b> STOP                                                                       | Fertile   |
| #5                            | ♀      | Wild type<br>...CACCGG <b>CCAGCACTAGCCAAAGCTAACCCAGCCGCCAACCAATGCAGAAATC</b><br>AGTGTCCAGCTCGGGTTA...                                                                                                                                                                            | Wild type<br>...HRPA--NPAANNAEISVQLGL...                                                                            | Fertile   |
| #6                            | ♀      | Wild type<br>...CACCGG <b>CCAGCACTAGCCAAAGCTAACCCAGCCGCCAACCAATGCAGAAATC</b><br>AGTGTCCAGCTCGGGTTA...                                                                                                                                                                            | Wild type<br>...HRPA <b>ARVRVEQT</b> STOP                                                                           | Fertile   |
| #7                            | ♀      | Wild type<br>...CACCGG <b>CCAGCACTAGCCAAAGCTAACCCAGCCGCCAACCAATGCAGAAATC</b><br>AGTGTCCAGCTCGGGTTA...<br>...CACCGG <b>CCAGCACTAGCCAAAGCTAACCCAGCCGCCAACCAATGCAGAAATC</b><br>AGTGTCCAGCTCGGGTTA...<br>Wild type                                                                   | Wild type<br>...HRV <b>RV</b> EQ <b>TS</b> STOP<br>...QLTQPPTMOKSVSS <b>SG</b> STOP<br>...HRPA--ANPAANNAEISVQLGL... | Fertile   |

B

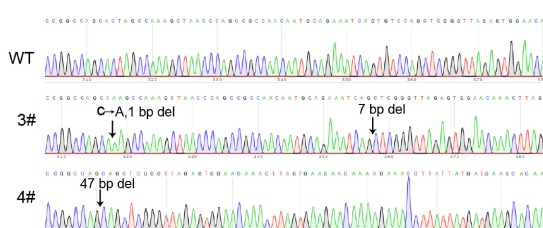

C

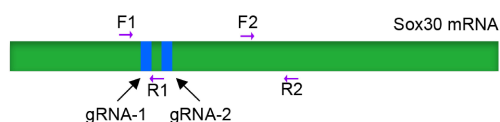

D

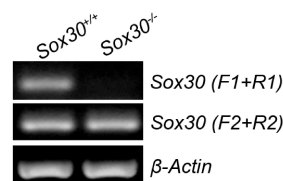

E

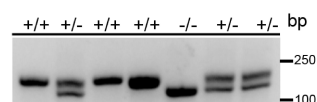

**Fig. S3. Generation of Sox30 mutant mice.** (A) A summary of founders with mutated Sox30 alleles following CRISPR/CAS9-mediated genome editing. (B) Examples of sequencing results from mutated-Sox30 founders (founder #3 and #4). (C) Schematic diagram of the RT-PCR strategy used to identify wild-type and mutant Sox30 transcripts. The location of primer pairs (F1/R1 and F2/R2) is shown relative to the targeting sites of sgRNA-1 and -2. (D) RT-PCR with primer pairs shown in (C) reveals the presence of full-length transcripts in testis from WT but not founder #4 (Sox30<sup>-/-</sup>) mice, which only contain truncated Sox30 mRNA. (E) Examples of PCR genotyping of the Sox30 mutated region in WT, Sox30<sup>+/-</sup> and Sox30<sup>-/-</sup> mice.

Fig. S4

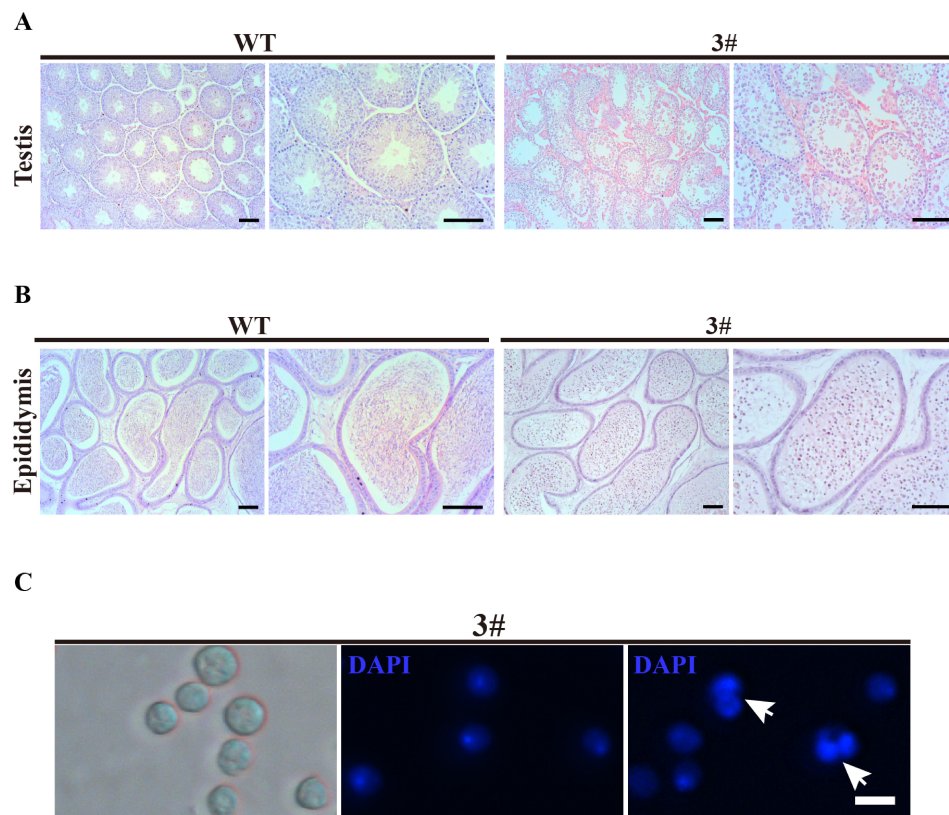

**Fig. S4. Similar spermiogenic defects in founder mice with different biallelic *Sox30* mutations.** (A-B) H&E stained tissue sections from the testis (A) and epididymis (B) of adult WT and founder #3 illustrate a similar phenotype in founder #3 and *Sox30*<sup>-/-</sup> mice derived from founder #4 (see Fig. 2I and J). Scale bars, 100  $\mu$ m. (C) Differential interference contrast (DIC) microscopy and DAPI stained showing immature germ cells and spermatids with condensed nuclei (white arrow) in the epididymis from founder #3. Scale bars, 10  $\mu$ m.

Fig. S5

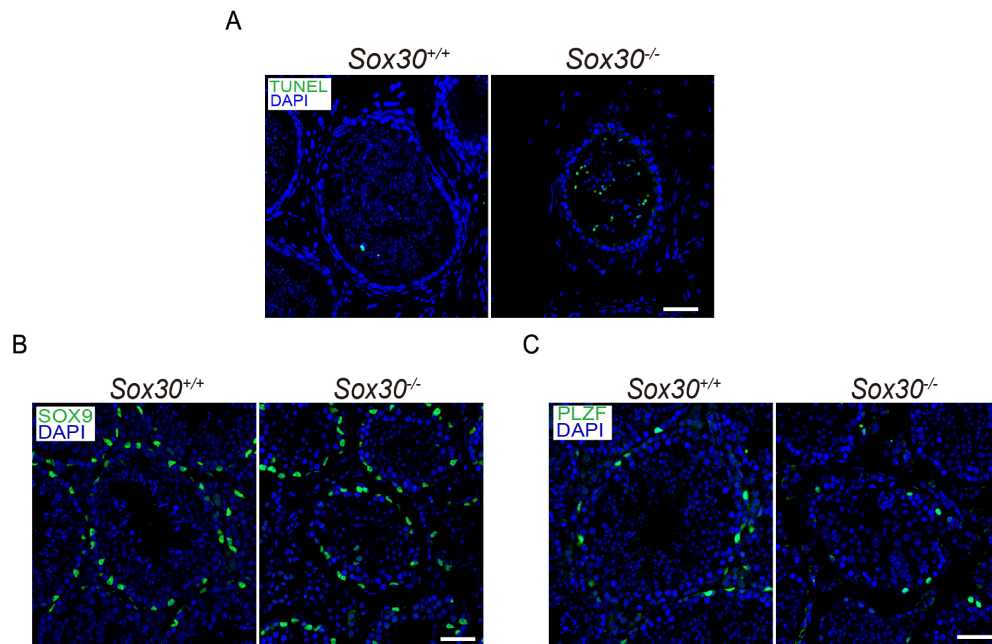

**Fig. S5. Somatic cells and pre-meiotic germ cells are not affected by *Sox30* deficiency.** (A) TUNEL assay in epididymal tissue sections from 8-week-old *Sox30*<sup>+/+</sup> and *Sox30*<sup>-/-</sup> males. Scale bars, 50 μm. Immunostaining of testis sections from adult WT and *Sox30*<sup>-/-</sup> mice with anti-Sox9 (B) and anti-PLZF (C) antibodies. Scale bars, 50 μm.

Fig. S6

Go analysis on down-regulated genes in Sox30<sup>-/-</sup> round spermatids

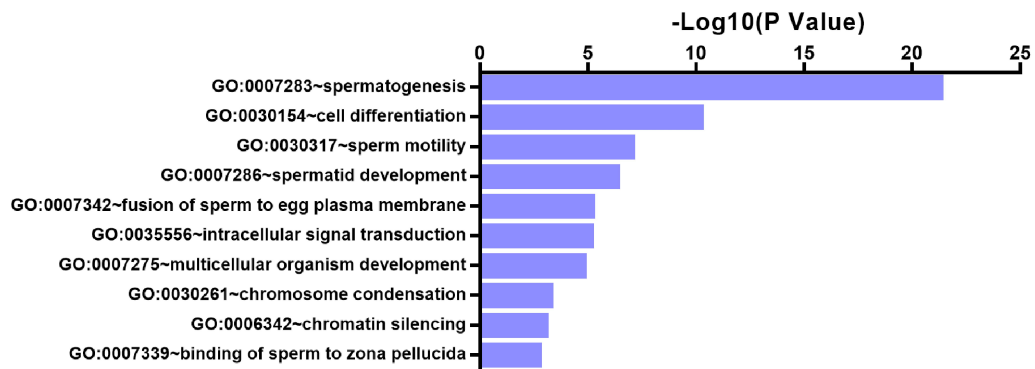

Fig. S6. GO term enrichment analysis for downregulated transcripts identified in round spermatids of Sox30<sup>-/-</sup> mice.

**Fig. S7**

Expression of disregulated genes in *Sox30*<sup>-/-</sup> round spermatids  
in three spermatogenic population

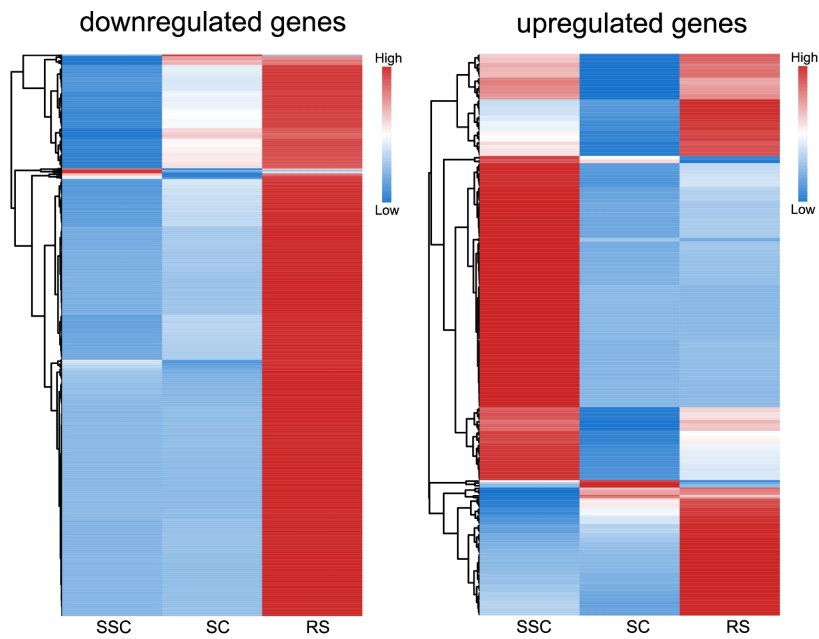

**Fig. S7.** Genes upregulated or downregulated in *Sox30*<sup>-/-</sup> round spermatids were used to produce heatmaps showing their expression pattern in stage-specific spermatogenic populations. SSC, spermatogonial stem cells; SC, pachytene spermatocytes; RS, round spermatids.

Fig. S8

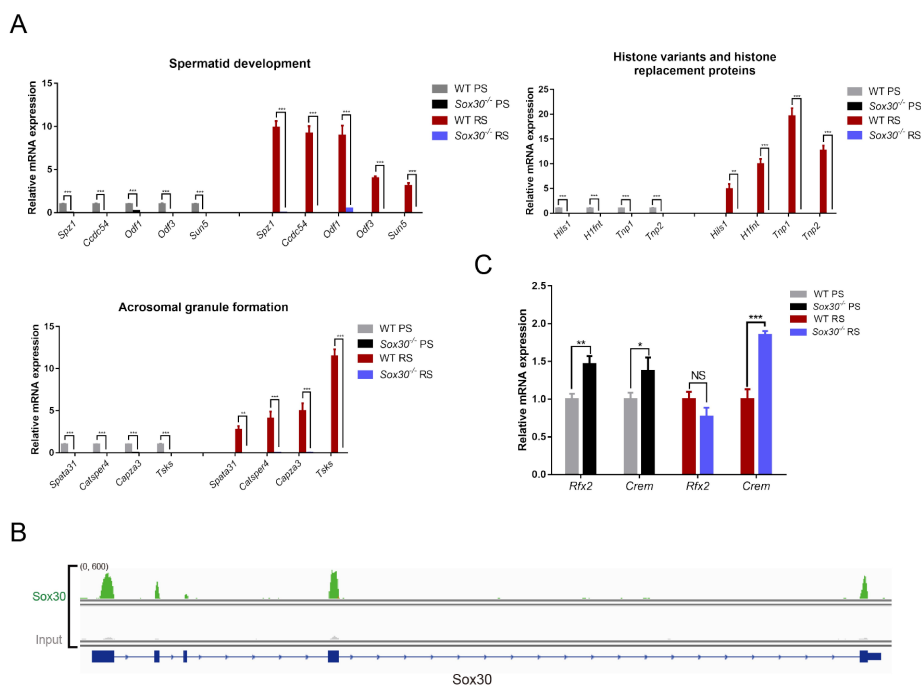

Fig. S8. (A) Q-PCR validation for downregulated transcripts in *Sox30*<sup>-/-</sup> pachytene spermatocytes and round spermatids. Pachytene spermatocytes were isolated for 8-week-old wild-type and *Sox30*<sup>-/-</sup> mice by STA-PUT method. WT, n=6; *Sox30*<sup>-/-</sup>, n=8. Data presented are mean  $\pm$  s.d. Student's t test. \*P<0.05, \*\*P<0.01 and \*\*\*P<0.001. (B) Genome browser view of Sox30 ChIP-seq reads on the promoter of Sox30. (C) Q-PCR analysis of *Crem* and *Rfx2* mRNA levels in wild-type and *Sox30*<sup>-/-</sup> PS and RS.



**Fig. S9**

**A**

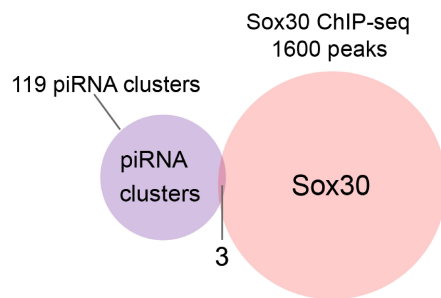

**B**

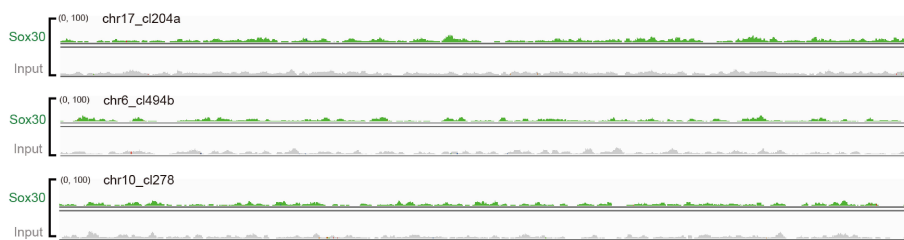

**C**

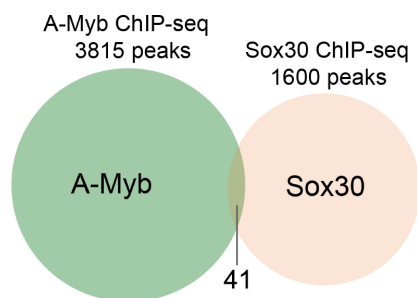

Fig. S9. (A) Overlapping binding sites of Sox30 ChIP-seq peaks and 119 annotated pachytene piRNA clusters in testis. (B) Genome browser view of Sox30 ChIP-seq reads on representative examples of top 10 pachytene piRNA clusters. (C) Overlapping binding sites of Sox30 and A-Myb ChIP-seq peaks in testis.

**Table S1.** Differentially expressed genes list in *Sox30*-deficient testes at postnatal day 21. RNA were extracted from three individual wild-type and *Sox30*<sup>-/-</sup> mice and deep-sequenced separately. P<0.05, fold change >2.

[Click here to Download Table S1](#)

**Table S2.** Differentially expressed genes list in *Sox30*-deficient pachytene spermatocytes. FDR<0.01, fold change >2. Pachytene spermatocytes were isolated for 8-week-old wild-type and *Sox30*<sup>-/-</sup> mice by STA-PUT method. WT, n=6; *Sox30*<sup>-/-</sup>, n=8.

[Click here to Download Table S2](#)

**Table S3.** Differentially expressed genes list in *Sox30*-deficient round spermatids. FDR<0.01, fold change >2. Round spermatids were isolated for 8-week-old wild-type and *Sox30*<sup>-/-</sup> mice by STA-PUT method. WT, n=6; *Sox30*<sup>-/-</sup>, n=8.

[Click here to Download Table S3](#)

**Table S4.** *Sox30* bound genomic loci in mouse testes at P28. Excel table showing annotation of binding peaks of *Sox30*.

[Click here to Download Table S4](#)

**Table S5.** *De novo* motif analysis of *Sox30* ChIP-seq with MEME algorithm. The motif prediction MEME were used to obtain enriched binding motif of *Sox30*. E-value is indicated.

| MEME motif                                                                          | E-value  |
|-------------------------------------------------------------------------------------|----------|
|  | 7.2e-147 |
|  | 2.4e-030 |
|  | 5.6e-009 |

**Table S6.** Excel list of genes bound by Sox30 in their promoters and exhibiting differential expression in *Sox30*<sup>-/-</sup> pachytene spermatocytes and round spermatids, related to the Venn diagram in Fig. 6E-F. Sheet 1: genes with Sox30 ChIP-seq peaks at promoters; Sheet 2: genes downregulated in *Sox30*<sup>-/-</sup> PS (FDR<0.01, fold change >2) bound by Sox30 at promoters; Sheet 3: genes downregulated in *Sox30*<sup>-/-</sup> RS (FDR<0.01, fold change >2) bound by Sox30 at promoters; sheet 4: genes upregulated in *Sox30*<sup>-/-</sup> PS (FDR<0.01, fold change >2) bound by Sox30 at promoters; sheet 5: genes upregulated in *Sox30*<sup>-/-</sup> RS (FDR<0.01, fold change >2) bound by Sox30 at promoters.

[Click here to Download Table S6](#)

**Table S7.** Primer sequences for RT-PCR and ChIP-qPCR.

| Targeted gene           | Forward (5' → 3')         | Reverse (5' → 3')          | Application    |
|-------------------------|---------------------------|----------------------------|----------------|
| Sox30                   | ACCTGTCGGTGGGATCTCG       | CAGCCTACAATCGTCCCCTGG      | qRT-PCR        |
| Sox30                   | GCTCCAACCTAGAATGCTGAGT    | AACTCCTCTCTGTGCTTCTCTT     | Genotyping PCR |
| Sox30                   | GCCTTCTGTAAAATGAAACCA     | GTGCCAGTATGGGTCTGTCT       | F1/R1          |
| Sox30                   | AAGCACAGAGAGGAGTTTCCTG    | CGGGAATTACCACAGAGTAGGT     | F2/R2          |
| pre-piR1                | GTTAGCGAAGGACATTATTCTAAC  | TGACATGAACACAGGTGCTCAGAT   | RT-PCR         |
| pre-piR2                | CTATGCTTATGATGGCATTGGAGAG | TTCCAGTTCAACAGGGACACGGGAC  | RT-PCR         |
| pre-piR3                | GTTCTCACITTTATCAGCTCTCAAG | TGAGAGTGGCATCTAAATGTTTAG   | RT-PCR         |
| pre-piLR                | GTGAAGCTAAGGATGCTGGGATAG  | ACAGGATGTCCCCCTGAAATCAGTC  | RT-PCR         |
| Prepachytene cluster 10 | GGCCATAGGTTAACTTCAGAAGTC  | CTATAACTGCAAGTTCAGGTGGACAG | RT-PCR         |
| pri-let7g               | GTACGGTGTGGACCTCATCA      | TCTTGCTGTGTCCAGGAAAG       | RT-PCR         |
| β-actin                 | CCGTAAAGACCTCTATGCC       | CTCAGTAACAGTCCGCCTA        | RT-PCR         |
| Spz1                    | ATGTCGGACACAGACAACTCA     | GTGGTGGGAAGGAGTGGTAG       | qRT-PCR        |
| Ccdc54                  | CACACAAAAGAGTAAGAGCTGC    | TGGGTCGTACATTTCTGGTAAAC    | qRT-PCR        |
| Odf1                    | CCGCACTGAGTTGTCTTTTGG     | GGGTGCATGTATAAGTCACACA     | qRT-PCR        |
| Odf3                    | AAGTTCAAGGCTCCACAGTACA    | TTGATGCCAAAGGTGACAGTAG     | qRT-PCR        |
| Sun5                    | TGGATCCGACTGTGGAACACTAC   | GGTAGACTTTCTGGGCCAAAC      | qRT-PCR        |
| Hils1                   | GGTCCCAAGCCAGAGTGAG       | AGCTTTCTTCAAGGTGCAAGG      | qRT-PCR        |
| H1fnt                   | GGCGCAGAACTTACGATCCA      | GACTTCCCCTCGTGGTGAG        | qRT-PCR        |
| Tnp1                    | ACCAGCCGCAAGCTAAAGAC      | TTTCTACTTTTCAGGACGCTC      | qRT-PCR        |
| Tnp2                    | GTGCACTCTCGACACTCACCT     | AGCTACGCCTCTTAGCTCTGTG     | qRT-PCR        |
| Spata31                 | TCAGTCCACTATATGGGCAA      | CTTTTTCAGGCATTCTCCCAA      | qRT-PCR        |
| Catsper4                | GGTCGGCATGAGGAGCAAG       | AATGGTGATAGCGTTGGACAG      | qRT-PCR        |
| Capza3                  | TCCACAGGCTCTTAGTCCAGG     | GTTGCCGTGATGCAGAGT         | qRT-PCR        |
| Tsks                    | GTGGTGGTGAAGACAATCTGG     | GACCGCTTGAGTTTTCAGGC       | qRT-PCR        |
| 36B4                    | GCAGATCGGGTACCCTAAGTGG    | CAGCAGCCGCAATGCAGATG       | qRT-PCR        |
| RFX2                    | AGACCCTCAGCTTACGCC        | GTGCCACCTGGAGTCTCAA        | qRT-PCR        |
| Crem                    | ATGTCTTGAAAATCGTGTGGCT    | TGGCAATAAAGCTCTTGGAGGG     | qRT-PCR        |
| Line1                   | GAGAACATCGGCACAACAATC     | TTTATTGGCGAGTTGAGACCA      | qRT-PCR        |
| IAP                     | CAGACTGGGAGGAAGAAGCA      | ATTGTTCCCTCACTGGCAAA       | qRT-PCR        |
| Hils1                   | CTGTTGCCTCAGACCTTCTAA     | GGCTCAGAGACTGGTGAAGTTA     | ChIP-qPCR      |
| Tnp1                    | CAGCAAGGTGTAGCAAAGGTTA    | CCGAAATGAGGGGCTTTG         | ChIP-qPCR      |
| Ccdc54                  | ACAGGAATGGTACATGCAGTA     | CCTGGTCACATCATTGAATACC     | ChIP-qPCR      |
| Tsks                    | CAGCACCTATTCTCCCCCTTAC    | GGGGGAGACTCACCATCTACTC     | ChIP-qPCR      |
| Odf3                    | GACAATGACCTCTGGCCCAA      | CTCGTGTGTTGCTGGAGAT        | ChIP-qPCR      |
| Spz1                    | TGTCTGAGTTGTGGACAGG       | GGCCCCAGCTACTAGGTCTT       | ChIP-qPCR      |
| Plzf                    | GTAGGAAACCCGGGAAGGACT     | TGCAGCAGCAACCAGAGAAC       | ChIP-qPCR      |
| Gapdh                   | CCTCTGCGCCCTGAGCTAGGA     | CACAAGAAGATGCGGCCGTCTC     | ChIP-qPCR      |
